# Supplementary material
Source: Springer Nature journal article supplement (https://www.springermedizin.de/resource/supplementary/13045_2011_155_MOESM4_ESM.pdf/9660760)

GM00637

HTB4

HTB9

HTB2

HTB3

HTB5

HT1197

HT1376

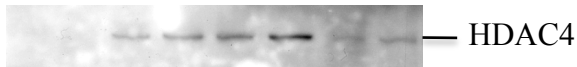

— HDAC4

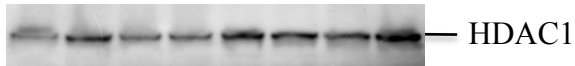

— HDAC1

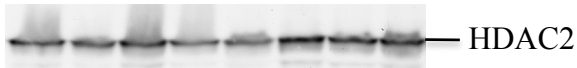

— HDAC2

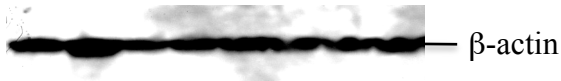

—  $\beta$ -actin

Supplement: MOESM4 [file 9660760]
